# Supplementary material
Source: PubMed Central journal article supplement (PMC6364551)
Supplement: NIHMS1002879-supplement-SI.pdf [file NIHMS1002879-supplement-SI.pdf]

S1

■ proteins ■ fat from chow ■ fat from supplements ■ carbohydrates

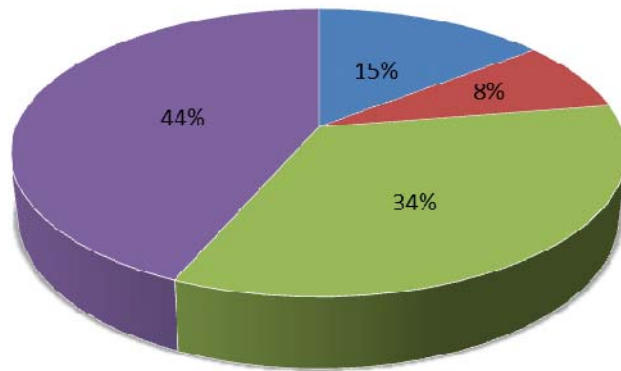

S2

| Uptake media       | Labeled FA<br>0.1mCi/mL<br>55mCi/mmol (μL) |      | Non-labeled FA<br>35.6 mM (μL) |     | EtOH<br>(μL) | 10 mM<br>taurocholate/PBS for<br>Non-oxidized FA uptake<br>media (μL) | 10 mM<br>taurocholate/PBS for<br>oxidized FA uptake<br>media (μL) |
|--------------------|--------------------------------------------|------|--------------------------------|-----|--------------|-----------------------------------------------------------------------|-------------------------------------------------------------------|
|                    | EPA*                                       | DHA* | EPA                            | DHA |              |                                                                       |                                                                   |
| <b>EPA*</b>        | 12.4                                       |      | 12                             |     | 50.6         | 14925                                                                 | 925                                                               |
| <b>DHA*</b>        |                                            | 12.4 |                                | 12  | 50.6         | 14925                                                                 | 925                                                               |
| <b>1:1EPA*:DHA</b> | 6.2                                        |      | 6                              | 6.3 | 56.5         | 14925                                                                 | 925                                                               |
| <b>1:1EPA:DHA*</b> |                                            | 6.2  | 6.3                            | 6   | 56.5         | 14925                                                                 | 925                                                               |
| <b>2:1EPA*:DHA</b> | 8.3                                        |      | 8                              | 4.2 | 54.5         | 14925                                                                 | 925                                                               |
| <b>2:1EPA:DHA*</b> |                                            | 4.1  | 8.4                            | 4   | 58.5         | 14925                                                                 | 925                                                               |
| <b>1:2EPA*:DHA</b> | 4.1                                        |      | 4                              | 8.4 | 58.5         | 14925                                                                 | 925                                                               |
| <b>1:2EPA:DHA*</b> |                                            | 8.3  | 4.2                            | 8   | 54.5         | 14925                                                                 | 925                                                               |
